# Supplementary material for: Construction of an Early Warning System Based on a Fuzzy Matter-Element Model for Diagnosing the Health of Alpine Grassland: A Case Study of Henan County, Qinghai, China
Source: MDPI journal article supplement (doi:10.3390/agronomy13082176), 2023-08-19
Supplement: s1 [file s1]

## Supporting Information

# Construction of an Early Warning System Based on a Fuzzy Matter-Element Model for Diagnosing the Health of Alpine Grassland: A Case Study of Henan County, Qinghai, China

Huilan Shi <sup>1</sup>, Mengping Liu <sup>1,2</sup>, Shihai Zhu <sup>1</sup>, Zhonghua Duan <sup>3</sup>, Rongrong Wu <sup>1</sup>, Xiaolong Quan <sup>3</sup>, Mengci Chen <sup>3</sup>, Jiexue Zhang <sup>1</sup> and Youming Qiao <sup>3,\*</sup>

<sup>1</sup> College of Eco-Environmental Engineering, Qinghai University, Xi'ning 810016, China

<sup>2</sup> Bureau of Ecology and Environment of Puyang, Pu'yang 457005, China

<sup>3</sup> State Key Laboratory of Plateau Ecology and Agriculture, Qinghai University, Xi'ning 810016, China

\* Correspondence: ymqiao@aliyun.com

A manuscript submitted to the *Agronomy*.

**Table S1** The weights and steps of each evaluation factor

$$A - B = \begin{bmatrix} 1 & 4 & 3 \\ \frac{1}{4} & 1 & 2 \\ \frac{1}{3} & \frac{1}{2} & 1 \end{bmatrix} \quad B_1 - C = \begin{bmatrix} 1 & 2 & 5 & 3 & \frac{1}{2} & \frac{1}{4} \\ \frac{1}{2} & 1 & 3 & 2 & \frac{1}{2} & \frac{1}{4} \\ \frac{1}{5} & \frac{1}{3} & 1 & \frac{1}{2} & \frac{1}{3} & \frac{1}{7} \\ \frac{1}{3} & \frac{1}{4} & 2 & 1 & \frac{1}{2} & \frac{1}{4} \\ 2 & 2 & 3 & 2 & 1 & \frac{1}{3} \\ 4 & 5 & 7 & 4 & 3 & 1 \end{bmatrix} \quad B_2 - C = \begin{bmatrix} \frac{1}{7} & 7 & 5 & 3 & 2 & 3 \\ \frac{1}{7} & 1 & \frac{1}{3} & \frac{1}{5} & \frac{1}{5} & \frac{1}{3} \\ \frac{1}{5} & 3 & 1 & \frac{1}{3} & \frac{1}{3} & \frac{1}{2} \\ \frac{1}{3} & 5 & 3 & 1 & 2 & 3 \\ \frac{1}{2} & 5 & 3 & \frac{1}{2} & 1 & 2 \\ \frac{1}{3} & 3 & 2 & \frac{1}{3} & \frac{1}{2} & 1 \end{bmatrix} \quad B_3 - C = \begin{bmatrix} 1 & \frac{1}{3} & 3 \\ \frac{1}{3} & 1 & 5 \\ \frac{1}{3} & \frac{1}{5} & 1 \end{bmatrix}$$

**Table S2** Mean random consistency index *R.I.* values

| n  | 1 | 2 | 3    | 4    | 5    | 6    | 7    | 8    | 9    | 10   | 11   | 12   | 13   | 14   | 15   |
|----|---|---|------|------|------|------|------|------|------|------|------|------|------|------|------|
| RI | 0 | 0 | 0.52 | 0.89 | 1.12 | 1.26 | 1.36 | 1.41 | 1.46 | 1.49 | 1.52 | 1.54 | 1.56 | 1.58 | 1.59 |

**Table S3** Thresholds values ( $S_i$ ) of individual indicators  $C_i$  ( $U_{ij}$ ) used in calculating the level of warning

| Indicators |                                                    | No warning | Light warning | Threatened warning | Dangerous warning | Collapsed warning |
|------------|----------------------------------------------------|------------|---------------|--------------------|-------------------|-------------------|
|            |                                                    | < $S_4$    | $S_4$ - $S_3$ | $S_3$ - $S_2$      | $S_2$ - $S_1$     | $\geq S_1$        |
| $C_1$      | Alopecia proportions (%)                           | <10        | 10-15         | 15-20              | 20-25             | $\geq 25$         |
| $C_2$      | Thickness of the turf layer (cm)                   | >12        | 10-12         | 8-10               | 6-8               | $\leq 6$          |
| $C_3$      | Aboveground biomass (g/m <sup>2</sup> )            | >100       | 86-100        | 71-85              | 55-70             | $\leq 55$         |
| $C_4$      | Vegetation coverage (%)                            | >90        | 81-90         | 71-80              | 61-70             | $\leq 60$         |
| $C_5$      | Dominant height (cm)                               | >10        | 7-10          | 5-7                | 3-5               | $\leq 3$          |
| $C_6$      | Plant diversity (species/0.25 m <sup>2</sup> )     | >15        | 10-15         | 8-10               | 6-8               | $\leq 6$          |
| $C_7$      | Total carbon (g/Kg)                                | >40        | 40-30         | 30-20              | 20-10             | $\leq 10$         |
| $C_8$      | Available phosphorus (mg/Kg)                       | >20        | 20-15         | 15-10              | 10-5              | $\leq 5$          |
| $C_9$      | Total nitrogen (g/Kg)                              | >10        | 7-10          | 5-7                | 3-5               | $\leq 3$          |
| $C_{10}$   | Available potassium (mg/Kg)                        | >166       | 166-133       | 133-100            | 100-67            | $\leq 67$         |
| $C_{11}$   | Moisture (%)                                       | >40        | 40-30         | 30-20              | 20-10             | $\leq 10$         |
| $C_{12}$   | Slope (°)                                          | $\leq 5$   | 5-15          | 15-25              | 25-35             | >35               |
| $C_{13}$   | Grazing intensity (sheep-unit /hm <sup>2</sup> .a) | $\leq 0.9$ | 0.9-1.2       | 1.2-1.5            | 1.5-1.8           | >1.8              |
| $C_{14}$   | Forage production (RMB/hm <sup>2</sup> )           | >50        | 40-50         | 30-40              | 20-30             | $\leq 20$         |
| $C_{15}$   | Fine forage ratio (%)                              | >75        | 56-75         | 46-55              | 36-45             | $\leq 36$         |

**Note:**  $S_i$ -The thresholds values of individual indicators,  $i$  from 1-4;  $U_{ij}$ -The true values of the individual indicators  $C_i$ ,  $i$  from 1-15,  $j$  from 1-8.

**Table S4** The formula used to standardize  $U_{ij}$  to  $X_{ij}$  based on the level of warning judged from

| Level of Warning | formula                                                                       |
|------------------|-------------------------------------------------------------------------------|
| No warning       | $X_{ij} = 2 + 2 \times (U_{ij} - S_4)/S_4 \quad (U_{ij} < S_4)$               |
| Light warning    | $X_{ij} = 4 + 2 \times (U_{ij} - S_3)/(S_3 - S_4) \quad (S_4 < U_{ij} < S_3)$ |
| Medium warning   | $X_{ij} = 6 + 2 \times (U_{ij} - S_2)/(S_2 - S_3) \quad (S_3 < U_{ij} < S_2)$ |
| Serious warning  | $X_{ij} = 8 + 2 \times (U_{ij} - S_1)/(S_1 - S_2) \quad (S_2 < U_{ij} < S_1)$ |
| Giant warning    | $X_{ij} = 8 + 2 \times (U_{ij} - S_1)/S_1 \quad (S_1 \leq U_{ij})$            |

**Note:**  $U_{ij}$ -The true values of the individual indicators  $C_i$ , i from 1-15, j from 1-8;  $X_{ij}$ -The standardized values of  $U_{ij}$ ; If  $X_{ij} < 0$ , the value is 0; if  $X_{ij} > 10$ , the value is 10.

**Table S5** Test of the consistency of the indicators' weights

| Single ranking   | A-B   | B-B <sub>1</sub> | B-B <sub>2</sub> | B-B <sub>3</sub> |
|------------------|-------|------------------|------------------|------------------|
| $\lambda_{\max}$ | 3.006 | 6.194            | 6.247            | 3.065            |
| C. I             | 0.036 | 0.039            | 0.049            | 0.032            |
| R. I             | 0.520 | 1.260            | 1.260            | 0.520            |
| C. R             | 0.069 | 0.031            | 0.039            | 0.062            |
| Consistency      | Yes   | Yes              | Yes              | Yes              |
